# Supplementary material
Source: publisher figshare collection journal article supplement (https://tandf.figshare.com/ndownloader/files/30464005)
Supplement: Supplementary file 1 [file 30464005]

Appendix A. CONSORT Chart (For online only)

Excluded (3551):

  Not meeting inclusion criteria (3383)

  Declined to participate (168)

## Enrollment

Assessed for eligibility (N=4495)

## Allocation

Randomized (944)

Assigned to treatment group (463). Received intervention (430).

Did not receive intervention (33);

Reasons: Changed mind prior to start (13), medical problem (1), not enough time to participate (2), moved out of intervention zone (17).

Allocated to control group (481)

Lost to follow-up (75):

Reasons: Changed mind (18), not enough time (8), migrated out of country (11), other (8), not located (4), moved out of zone (26).

Discontinued intervention (58).

Reasons: Changed mind (16), not enough time to participate (14), migrated out of country (9), moved out of intervention zone (11), medical problem (3), other (5).

## Follow Up

Analyzed (406)

Analyzed (371).
Excluded from analysis (1):

Reason: Data not available.

## Analysis

| **Appendix B. Descriptive statistics for outcome measures at pre-test (n=777)** | | | | | | |  |
| --- | --- | --- | --- | --- | --- | --- | --- |
|  |  | Treatment Group (n=371) | | Control Group (n=406) | |  |  |
|  | Range | Mean/  proportion | sd | Mean/  proportion | sd | sig. | Effect sizea |
| **FACES** |  |  |  |  |  |  |  |
| Balanced scales: |  |  |  |  |  |  |  |
| Balanced cohesion | 7-35 | 26.6 | 3.7 | 26.3 | 4.1 |  | -0.09 |
| Balanced flexibility | 7-35 | 25.5 | 3.7 | 25.6 | 3.6 |  | -0.01 |
| Unbalanced scales: |  |  |  |  |  |  |  |
| Disengaged | 7-35 | 20.7 | 3.9 | 20.7 | 3.9 |  | 0.02 |
| Enmeshed | 7-35 | 22.3 | 3.0 | 22.1 | 3.2 |  | -0.09 |
| Rigid | 7-35 | 24.4 | 3.4 | 24.2 | 3.5 |  | -0.00 |
| Chaos | 7-35 | 20.0 | 4.6 | 19.7 | 4.7 |  | -0.06 |
| Family scales: |  |  |  |  |  |  |  |
| Family communication | 10-50 | 35.6 | 5.9 | 35.7 | 6.6 |  | -0.03 |
| Family satisfaction | 10-50 | 30.7 | 7.2 | 31.2 | 7.6 |  | 0.05 |
| **Risk/protective factors** |  |  |  |  |  |  |  |
| Community risk factors: |  |  |  |  |  |  |  |
| Transitions and mobility | 0-100 | 21.1 | 21.4 | 19.0 | 20.9 |  | -0.10 |
| Low neighborhood attachment | 0-100 | 24.4 | 32.8 | 23.1 | 28.9 |  | -0.04 |
| Community disorganization | 0-100 | 57.2 | 21.9 | 57.3 | 22.8 |  | 0.00 |
| Laws and norms favorable to drug use | 0-100 | 23.3 | 23.0 | 24.9 | 23.7 |  | 0.07 |
| Perceived availability of drugs | 0-100 | 37.9 | 31.4 | 43.2 | 31.9 | * | 0.17 |
| Community protective factors: |  |  |  |  |  |  |  |
| Opportunities for prosocial involvement | 0-100 | 61.8 | 27.0 | 61.6 | 27.5 |  | -0.01 |
| Rewards for prosocial involvement | 0-100 | 30.3 | 34.1 | 31.7 | 34.5 |  | 0.04 |
| Overall community risk | 0-100 | 38.8 | 10.4 | 39.2 | 9.4 |  | 0.04 |
| Family risk factors: |  |  |  |  |  |  |  |
| Family history of antisocial behavior | 0-100 | 18.8 | 19.1 | 18.3 | 18.5 |  | -0.03 |
| Parental attitudes favorable toward drug use | 0-100 | 12.1 | 15.2 | 14.9 | 17.2 | * | 0.17 |
| Poor family management | 0-100 | 27.2 | 22.7 | 26.1 | 22.4 |  | -0.05 |
| Family conflict | 0-100 | 65.4 | 33.7 | 67.3 | 32.9 |  | 0.05 |
| Weak parental supervision | 0-100 | 34.7 | 23 | 34.9 | 22.7 |  | 0.01 |
| Family gang influence | 0-100 | 21.2 | 23.8 | 21.1 | 24.7 |  | -0.01 |
| Family protective factors: |  |  |  |  |  |  |  |
| Attachment | 0-100 | 64.8 | 24.9 | 65.5 | 24.9 |  | 0.03 |
| Opportunities for prosocial involvement | 0-100 | 68.8 | 31.6 | 72.4 | 28.8 |  | 0.12 |
| Rewards for prosocial involvement | 0-100 | 66.8 | 25.6 | 66.8 | 24.1 |  | 0.00 |
| Overall family risk | 0-100 | 31.0 | 14.1 | 30.9 | 13.3 |  | -0.01 |
| Peer/individual risk factors: |  |  |  |  |  |  |  |
| Rebelliousness | 0-100 | 51.3 | 15.0 | 51.1 | 16.3 |  | -0.01 |
| Rewards for antisocial involvement | 0-100 | 15.9 | 23.4 | 17.4 | 24.8 |  | 0.06 |
| Favorable attitudes toward drug use | 0-100 | 21.2 | 22.1 | 23.4 | 23.7 |  | 0.09 |
| Favorable attitudes toward antisocial behavior | 0-100 | 21.8 | 20.3 | 23.7 | 22.9 |  | 0.09 |
| Perceived risks of drug use | 0-100 | 29.7 | 30.4 | 27.8 | 28.5 |  | -0.07 |
| Friends’ use of drugs | 0-100 | 18.7 | 24.8 | 20.5 | 24.2 |  | 0.07 |
| Interaction with antisocial peer | 0-100 | 17.7 | 17.1 | 18.7 | 19.4 |  | 0.06 |
| Intentions to use | 0-100 | 15.4 | 21.7 | 17.4 | 24.4 |  | 0.09 |
| Antisocial tendencies | 0-100 | 43.4 | 14.7 | 42.4 | 14.9 |  | -0.07 |
| Critical life events | 0-100 | 42.9 | 20.0 | 44.1 | 20.7 |  | 0.06 |
| Impulsive risk taking | 0-100 | 67.6 | 18.4 | 65.1 | 19.6 |  | -0.14 |
| Neutralization of guilt | 0-100 | 54.7 | 14.3 | 55.5 | 13.9 |  | 0.05 |
| Negative peer influence | 0-100 | 35.6 | 16.5 | 36.7 | 17.1 |  | 0.07 |
| Peer delinquency | 0-100 | 14.9 | 14.7 | 15.3 | 16.7 |  | 0.02 |
| Peer/individual protective factors: |  |  |  |  |  |  |  |
| Belief in the moral order | 0-100 | 65.5 | 23.1 | 61.9 | 23.2 | * | -0.15 |
| Rewards for prosocial involvement | 0-100 | 52.4 | 25.3 | 53.5 | 25.1 |  | 0.04 |
| Interaction with prosocial peers | 0-100 | 53.3 | 29.0 | 52.5 | 28.0 |  | -0.03 |
| Social skills | 0-100 | 66.4 | 20.9 | 66.8 | 21.6 |  | 0.02 |
| Overall peer/individual risk | 0-100 | 34.1 | 8.5 | 34.7 | 8.3 |  | 0.07 |
| Overall risk factor score | 0-100 | 34.3 | 8.0 | 34.6 | 7.8 |  | 0.04 |
| **Delinquency** |  |  |  |  |  |  |  |
| Physical violence | 0 - 8 | 0.6 | 1.0 | 0.6 | 1.0 |  | 0.01 |
| Property crime | 0 - 4 | 0.6 | 0.8 | 0.7 | 0.8 |  | 0.08 |
| Alcohol/drug use | 0 - 3 | 0.4 | 0.7 | 0.5 | 0.8 |  | 0.14 |
| Drug selling | 0 - 2 | 0.1 | 0.4 | 0.1 | 0.4 |  | 0.10 |
| Truancyc | 0 - 1 | 0.3 |  | 0.3 |  |  | 0.02 |
| General delinquency | 0-18 | 2.0 | 2.1 | 2.3 | 2.4 |  | 0.10 |
| Note. Description for general delinquency, risk/protectors, and FACES were at baseline (pre-treatment period) | | | | | | | |
| a. Effect size = Cohen's *d* estimation | | | | | | | |

| **Appendix C. Items descriptions by each risk and protective factors (Online only)** | | | | | | | |
| --- | --- | --- | --- | --- | --- | --- | --- |
|  |  | # of Items | ω | Range | Mean | SD | Response Categories | |
| **Community Risk Factors** | |  |  |  |  |  |  | |
| ***Transitions and Mobility*** | | 4 | 0.76 |  |  |  |  | |
|  | Have you changed homes in the past 6 months? |  |  | 0-1 | 0.22 | 0.42 | 0=No; 1=Yes | |
|  | Have you changed schools (including changing from elementary to middle or middle to high school) in the past six months? |  |  | 0-1 | 0.19 | 0.40 | 0=No; 1=Yes | |
|  | How many times have you changed schools (including changing from elementary to middle or middle to high school) since kindergarten? |  |  | 0-4 | 0.78 | 0.82 | 0=Never…4=7 or more times | |
|  | How many times have you changed homes since kindergarten? |  |  | 0-4 | 0.75 | 0.98 | 0=Never…4=7 or more times | |
| ***Low Neighborhood Attachment*** | | 2 | 0.59 |  |  |  |  | |
|  | I'd like to get out of my neighborhood |  |  | 1-4 | 1.88 | 1.27 | 1=No!...4=Yes! | |
|  | If I had to move, I would miss the neighborhood I now live in |  |  | 1-4 | 1.54 | 1.03 | 1=Yes!...4=No! | |
| ***Community Disorganization*** | | 10 | 0.88 |  |  |  |  | |
|  | How much do each of the following statements describe your neighborhood? |  |  |  |  |  |  | |
|  | Crime and/or drug selling |  |  | 1-4 | 2.56 | 1.36 | 1=No!...4=Yes! | |
|  | Fights |  |  | 1-4 | 3.01 | 1.27 | 1=No!...4=Yes! | |
|  | Lots of empty or abandoned buildings |  |  | 1-4 | 2.82 | 1.33 | 1=No!...4=Yes! | |
|  | Lots of graffiti |  |  | 1-4 | 2.30 | 1.34 | 1=No!...4=Yes! | |
|  | Please indicate how much of a problem each of the following is in your neighborhood. |  |  |  |  |  |  | |
|  | Run down or poorly kept buildings in your neighborhood |  |  | 0-2 | 0.87 | 0.81 | 0=Not a problem…2=A big problem | |
|  | Graffiti on buildings and fences in your neighborhood |  |  | 0-2 | 0.82 | 0.83 | 0=Not a problem…2=A big problem | |
|  | Hearing gunshots in your neighborhood |  |  | 0-2 | 1.40 | 0.76 | 0=Not a problem…2=A big problem | |
|  | Cars traveling too fast throughout the streets of your neighborhood |  |  | 0-2 | 1.35 | 0.79 | 0=Not a problem…2=A big problem | |
|  | Gangs in your neighborhood |  |  | 0-2 | 1.36 | 0.82 | 0=Not a problem…2=A big problem | |
|  | Cars without plates |  |  | 0-2 | 1.20 | 0.86 | 0=Not a problem…2=A big problem | |
| ***Laws and Norms Favorable to Drug Use*** | | 5 | 0.83 |  |  |  |  | |
|  | If a kid drank some beer, wine or hard liquor (for example, vodka, whiskey, or gin) in your neighborhood would he or she be caught by the police?* |  |  | 1-4 | 2.18 | 1.34 | 1=Yes!...4=No! | |
|  | If a kid smoked marijuana in your neighborhood would he or she be caught by the police?* |  |  | 1-4 | 1.74 | 1.17 | 1=Yes!...4=No! | |
|  | If a kid carried a handgun in your neighborhood would he or she be caught by the police?* |  |  | 1-4 | 1.51 | 0.99 | 1=Yes!...4=No! | |
|  | How wrong would most adults (over 21) in your neighborhood think it is for kids your age… |  |  |  |  |  |  | |
|  | …to use marijuana? |  |  | 1-4 | 1.52 | 0.87 | 1=Very wrong…4=Not wrong at all | |
|  | …to drink alcohol? |  |  | 1-4 | 1.66 | 0.92 | 1=Very wrong…4=Not wrong at all | |
| ***Perceived Availability of Drugs*** | | 4 | 0.80 |  |  |  |  | |
|  | If you wanted to get a drug like cocaine, heroin, or amphetamine, how easy would it be for you to get some? |  |  | 1-4 | 2.03 | 1.27 | 1=Very hard…4=Very easy | |
|  | If you wanted to get some marijuana, how easy would it be for you to get some? |  |  | 1-4 | 2.33 | 1.32 | 1=Very hard…4=Very easy | |
|  | If you wanted to get a handgun, how easy would it be for you to get one? |  |  | 1-4 | 1.70 | 1.09 | 1=Very hard…4=Very easy | |
|  | If you wanted to get some beer, wine or hard liquor (for example, vodka, whiskey or gin), how easy would it be for you to get some? |  |  | 1-4 | 2.83 | 1.30 | 1=Very hard…4=Very easy | |
| **Community Protective Factors** | |  |  |  |  |  |  | |
| ***Opportunities for Prosocial Involvement*** | | 5 | 0.82 |  |  |  |  | |
|  | There are lots of adults in my neighborhood I could talk to about something important* |  |  | 1-4 | 3.03 | 1.29 | 1=No!...4=Yes! | |
|  | Which of the following activities for people your age are available in your community? |  |  |  |  |  |  | |
|  | Sports teamsb |  |  | 0-1 | 0.81 | 0.39 | 0=No/I don't know; 1=Yes | |
|  | Religious youth groupsb |  |  | 0-1 | 0.72 | 0.45 | 0=No/I don't know; 1=Yes | |
|  | Service clubsb |  |  | 0-1 | 0.49 | 0.50 | 0=No/I don't know; 1=Yes | |
|  | Cultural organizationsb |  |  | 0-1 | 0.39 | 0.49 | 0=No/I don't know; 1=Yes | |
| ***Rewards for Prosocial Involvement*** | | 3 | 0.75 |  |  |  |  | |
|  | My neighbors notice when I am doing a good job and let me know about it |  |  | 1-4 | 2.07 | 1.32 | 1=No!...4=Yes! | |
|  | There are people in my neighborhood who are proud of me when I do something well |  |  | 1-4 | 1.92 | 1.24 | 1=No!...4=Yes! | |
|  | There are people in my neighborhood who encourage me to do my best |  |  | 1-4 | 1.80 | 1.19 | 1=No!...4=Yes! | |
| **Family Risk Factors** | |  |  |  |  |  |  | |
| ***Family History of Antisocial Behavior*** | | 4 | 0.80 |  |  |  |  | |
| About how many adults (over 21) have you known personally who in the past six months have… | | | | | | | | |
|  | … used marijuana, crack, cocaine, or other drugs? |  |  | 1-5 | 1.54 | 0.96 | 1=None…5=5 or more adults | |
|  | …sold or dealt drugs? |  |  | 1-5 | 1.16 | 0.54 | 1=None…5=5 or more adults | |
|  | …done other things that could get them in trouble with the police like stealing, selling stolen goods, mugging or assaulting others, etc. |  |  | 1-5 | 1.24 | 0.64 | 1=None…5=5 or more adults | |
|  | … gotten drunk or high? |  |  | 1-5 | 1.95 | 1.17 | 1=None…5=5 or more adults | |
| ***Parental Attitudes Favorable Toward Drug Use*** | | 5 | 0.83 |  |  |  |  | |
| How wrong do your parents feel it would be for you to… | |  |  |  |  |  |  | |
|  | …smoke marijuana? |  |  | 1-4 | 1.21 | 0.50 | 1=Very wrong…4=Not wrong at all | |
|  | …steal something worth more than $5? |  |  | 1-4 | 1.26 | 0.57 | 1=Very wrong…4=Not wrong at all | |
|  | …draw graffiti, or write things or draw pictures on buildings or other property (without the owner's permission)? |  |  | 1-4 | 1.46 | 0.74 | 1=Very wrong…4=Not wrong at all | |
|  | …pick a fight with someone? |  |  | 1-4 | 1.68 | 0.84 | 1=Very wrong…4=Not wrong at all | |
|  | …drink beer, wine or hard liquor (for example, vodka, whiskey or gin) regularly (at least once or twice a month)? |  |  | 1-4 | 1.42 | 0.71 | 1=Very wrong…4=Not wrong at all | |
| ***Poor Family Management*** | | 8 | 0.89 |  |  |  |  | |
|  | The rules in my family are clear |  |  | 1-4 | 1.96 | 1.24 | 1=Yes!...4=No! | |
|  | My parents ask if I’ve gotten my homework done |  |  | 1-4 | 1.57 | 1.08 | 1=Yes!...4=No! | |
|  | When I am not at home, one of my parents knows where I am and who I am with |  |  | 1-4 | 2.00 | 1.28 | 1=Yes!...4=No! | |
|  | Would your parents know if you did not come home on time? |  |  | 1-4 | 1.58 | 1.06 | 1=Yes!...4=No! | |
|  | My family has clear rules about alcohol and drug use |  |  | 1-4 | 2.09 | 1.38 | 1=Yes!...4=No! | |
|  | If you drank some beer or wine or hard liquor (for example, vodka, whiskey or gin) without your parents’ permission, would you be caught by your parents? |  |  | 1-4 | 1.79 | 1.23 | 1=Yes!...4=No! | |
|  | If you carried a handgun without your parents’ permission, would you be caught by your parents? |  |  | 1-4 | 1.58 | 1.10 | 1=Yes!...4=No! | |
|  | If you skipped school, would you be caught by your parents? |  |  | 1-4 | 1.83 | 1.22 | 1=Yes!...4=No! | |
| ***Family Conflict*** | | 3 | 0.75 |  |  |  |  | |
|  | We argue about the same things in my family over and over. |  |  | 1-4 | 3.02 | 1.23 | 1=No!...4=Yes! | |
|  | People in my family have serious arguments |  |  | 1-4 | 2.98 | 1.28 | 1=No!...4=Yes! | |
|  | People in my family often insult or yell at each other |  |  | 1-4 | 2.97 | 1.27 | 1=No!...4=Yes! | |
| ***Weak Parental Supervision*** | | 5 | 0.83 |  |  |  |  | |
|  | When I go out, I let my parents or guardians know where I am going |  |  | 1-5 | 2.79 | 1.55 | 1=Always…5=Never | |
|  | My parents or guardians ask me where I am going when I leave the house |  |  | 1-5 | 1.91 | 1.33 | 1=Always…5=Never | |
|  | My parents or guardians know who I am with when I’m not at home or school |  |  | 1-5 | 2.72 | 1.56 | 1=Always…5=Never | |
|  | My parents or guardians know who my friends are |  |  | 1-5 | 2.41 | 1.48 | 1=Always…5=Never | |
|  | I feel that my parents or guardians care about what I do |  |  | 1-5 | 2.12 | 1.43 | 1=Always…5=Never | |
| ***Family Gang Influence*** | | 2 | 0.67 |  |  |  |  | |
|  | Including all of the people that you consider part of your family, how many family members think that you will most likely join a gang one day? |  |  | 1-5 | 2.03 | 1.47 | 1=0…5=4 or more | |
|  | Currently, how many of your family members are in a gang? |  |  | 1-5 | 1.66 | 1.14 | 1=0…5=4 or more | |
| **Family Protective Factors** | |  |  |  |  |  |  | |
| ***Attachment*** | | 8 | 0.89 |  |  |  |  | |
|  | Do you feel very close to your mother? |  |  | 1-4 | 3.51 | 1.04 | 1=No!...4=Yes! | |
|  | Do you share your thoughts and feelings with your mother? |  |  | 1-4 | 3.15 | 1.24 | 1=No!...4=Yes! | |
|  | Do you feel close to your father? |  |  | 1-4 | 2.71 | 1.41 | 1=No!...4=Yes! | |
|  | Do you share your thoughts and feelings with your father? |  |  | 1-4 | 2.49 | 1.41 | 1=No!...4=Yes! | |
|  | You can talk to your parents about anything. |  |  | 1-5 | 3.26 | 1.45 | 1=Never…5=Always | |
|  | Your parents make you feel trusted. |  |  | 1-5 | 3.53 | 1.43 | 1=Never…5=Always | |
|  | You depend upon your parents for advice and guidance. |  |  | 1-5 | 3.76 | 1.36 | 1=Never…5=Always | |
|  | Your parents praise you when you do well. |  |  | 1-5 | 3.83 | 1.34 | 1=Never…5=Always | |
| ***Opportunities for Prosocial Involvement*** | | 3 | 0.75 |  |  |  |  | |
|  | If I had a personal problem, I could ask my mom or dad for help. |  |  | 1-4 | 3.50 | 0.97 | 1=No!...4=Yes! | |
|  | My parents give me lots of chances to do fun things with them. |  |  | 1-4 | 3.07 | 1.24 | 1=No!...4=Yes! | |
|  | My parents ask me what I think before most family decisions affecting me are made. |  |  | 1-4 | 2.78 | 1.34 | 1=No!...4=Yes! | |
| ***Rewards for Prosocial Involvement*** | | 4 | 0.80 |  |  |  |  | |
|  | Do you enjoy spending time with your mother? |  |  | 1-4 | 3.64 | 0.88 | 1=No!...4=Yes! | |
|  | Do you enjoy spending time with your father? |  |  | 1-4 | 2.94 | 1.35 | 1=No!...4=Yes! | |
|  | My parents notice when I am doing a good job and let me know about it. |  |  | 1-4 | 2.88 | 1.10 | 1=Never…4=All the times | |
|  | How often do your parents tell you they’re proud of you for something you’ve done? |  |  | 1-4 | 2.55 | 1.09 | 1=Never…4=All the times | |
| **Peer/Individual Risk Factors** | |  |  |  |  |  |  | |
| ***Rebelliousness*** | | 3 | 0.75 |  |  |  |  | |
|  | I like to see how much I can get away with. |  |  | 1-4 | 2.58 | 0.71 | 1=Very false…4=Very true | |
|  | I ignore rules that get in my way. |  |  | 1-4 | 2.59 | 0.68 | 1=Very false…4=Very true | |
|  | I do the opposite of what people tell me, just to get them mad. |  |  | 1-4 | 2.44 | 0.73 | 1=Very false…4=Very true | |
| ***Rewards for Antisocial Involvement*** | | 3 | 0.75 |  |  |  |  | |
| What are the chances you would be seen as cool if you | |  |  |  |  |  |  | |
|  | …began drinking alcoholic beverages regularly, that is, at least once or twice a month? |  |  | 1-5 | 1.78 | 1.17 | 1=No or very little chance…5=Very good chance | |
|  | …smoked marijuana? |  |  | 1-5 | 1.58 | 1.09 | 1=No or very little chance…5=Very good chance | |
|  | …carried a handgun? |  |  | 1-5 | 1.64 | 1.20 | 1=No or very little chance…5=Very good chance | |
| ***Favorable Attitudes Toward Drug Use*** | | 3 | 0.74 |  |  |  |  | |
| How wrong do you think it is for someone your age to | |  |  |  |  |  |  | |
|  | …drink beer, wine or hard liquor (for example, vodka, whiskey or gin) regularly, that is, at least once or twice a month? |  |  | 1-4 | 1.99 | 1.04 | 1=Very wrong…4=Not wrong at all | |
|  | …smoke marijuana? |  |  | 1-4 | 1.58 | 0.89 | 1=Very wrong…4=Not wrong at all | |
|  | …use heroin, cocaine, amphetamines or another illegal drug? |  |  | 1-4 | 1.43 | 0.81 | 1=Very wrong…4=Not wrong at all | |
| ***Favorable Attitudes Toward Antisocial Behavior*** | | 5 | 0.83 |  |  |  |  | |
| How wrong do you think it is for someone your age to… | |  |  |  |  |  |  | |
|  | …take a handgun to school? |  |  | 1-4 | 1.45 | 0.78 | 1=Very wrong…4=Not wrong at all | |
|  | …steal something worth more than $5? |  |  | 1-4 | 1.60 | 0.86 | 1=Very wrong…4=Not wrong at all | |
|  | …pick a fight with someone? |  |  | 1-4 | 2.02 | 0.97 | 1=Very wrong…4=Not wrong at all | |
|  | …attack someone with the idea of seriously hurting them? |  |  | 1-4 | 1.70 | 0.91 | 1=Very wrong…4=Not wrong at all | |
|  | …stay away from school all day when their parents think they are at school? |  |  | 1-4 | 1.64 | 0.93 | 1=Very wrong…4=Not wrong at all | |
| ***Perceived Risks of Drug Use*** | | 3 | 0.75 |  |  |  |  | |
| How much do you think people risk harming themselves (physically or in other ways) if they… | | | | | | | |
|  | try marijuana once or twice? |  |  | 1-4 | 1.90 | 1.14 | 1=Great risk…4=No risk | |
|  | smoke marijuana regularly (once or twice a week)? |  |  | 1-4 | 1.84 | 1.07 | 1=Great risk…4=No risk | |
|  | take one or two drinks of an alcoholic beverage (beer, wine, liquor) nearly every day? |  |  | 1-4 | 1.84 | 1.03 | 1=Great risk…4=No risk | |
| ***Friends’ Use of Drugs*** | | 3 | 0.75 |  |  |  |  | |
| In the past 6 months, how many of your best friends have… | |  |  |  |  |  |  | |
|  | …used marijuana? |  |  | 0-4 | 0.73 | 1.24 | 0=None of my friends…4=4 of my friends | |
|  | …used heroin, cocaine, amphetamines, or other illegal drugs? |  |  | 0-4 | 0.26 | 0.78 | 0=None of my friends…4=4 of my friends | |
|  | …tried beer, wine or hard liquor (for example, vodka, whiskey or gin) when their parents didn’t know about it? |  |  | 0-4 | 1.37 | 1.59 | 0=None of my friends…4=4 of my friends | |
| ***Interaction with Antisocial Peer*** | | 4 | 0.79 |  |  |  |  | |
| In the past 6 months, how many of your best friends have… | |  |  |  |  |  |  | |
|  | …been suspended from school? |  |  | 0-4 | 0.99 | 1.22 | 0=None of my friends…4=4 of my friends | |
|  | …carried a handgun? |  |  | 0-4 | 0.18 | 0.62 | 0=None of my friends…4=4 of my friends | |
|  | …been arrested? |  |  | 0-4 | 0.41 | 1.00 | 0=None of my friends…4=4 of my friends | |
|  | …dropped out of school? |  |  | 0-4 | 1.33 | 1.38 | 0=None of my friends…4=4 of my friends | |
| ***Intentions to Use*** | | 2 | 0.67 |  |  |  |  | |
|  | When I am an adult I will smoke marijuana. |  |  | 1-4 | 1.27 | 0.66 | 1=No!...4=Yes! | |
|  | When I am an adult I will drink beer, wine, or liquor. |  |  | 1-4 | 1.72 | 0.99 | 1=No!...4=Yes! | |
| ***Antisocial Tendencies*** | | 7 | 0.86 |  |  |  |  | |
|  | I am kind to others |  |  | 1-5 | 2.48 | 1.30 | 1=Always…5=Never | |
|  | I respect the feelings of others |  |  | 1-5 | 2.42 | 1.41 | 1=Always…5=Never | |
|  | I get angry easily |  |  | 1-5 | 4.02 | 1.32 | 1=Never…5=Always | |
|  | I am obedient |  |  | 1-5 | 3.34 | 1.24 | 1=Always…5=Never | |
|  | I threaten others to get what I want |  |  | 1-5 | 1.79 | 1.23 | 1=Never…5=Always | |
|  | People “blame me” for lying or cheating |  |  | 1-5 | 3.30 | 1.48 | 1=Never…5=Always | |
|  | I take things that don’t belong to me |  |  | 1-5 | 1.64 | 1.03 | 1=Never…5=Always | |
| ***Critical Life Events*** | | 7 | 0.86 |  |  |  |  | |
| In the last year, have you... | |  |  |  |  |  |  | |
|  | failed a grade in school? |  |  | 0-1 | 0.29 | 0.45 | 0=No; 1=Yes | |
|  | been expelled or suspended from your school due to disciplinary reasons? |  |  | 0-1 | 0.16 | 0.37 | 0=No; 1=Yes | |
|  | broken up with/ended a relationship with a boyfriend/girlfriend or been broken up with by a boyfriend/girlfriend? |  |  | 0-1 | 0.45 | 0.50 | 0=No; 1=Yes | |
|  | fought or had a problem with a friend? |  |  | 0-1 | 0.75 | 0.44 | 0=No; 1=Yes | |
|  | felt forced to abandon school for any reason? |  |  | 0-1 | 0.43 | 0.50 | 0=No; 1=Yes | |
|  | has someone close to you died or been seriously hurt due to an accident or illness? |  |  | 0-1 | 0.58 | 0.49 | 0=No; 1=Yes | |
|  | has someone close to you died (or was murdered) due to violence? |  |  | 0-1 | 0.39 | 0.49 | 0=No; 1=Yes | |
| ***Impulsive Risk Taking*** | | 4 | 0.80 |  |  |  |  | |
|  | Sometimes I like to do dangerous activities for fun |  |  | 1-5 | 3.57 | 1.18 | 1=Strongly disagree…5=Strongly agree | |
|  | Sometimes I find it exciting to do things that could get me in trouble |  |  | 1-5 | 3.58 | 1.12 | 1=Strongly disagree…5=Strongly agree | |
|  | I frequently do things without thinking if I’ll get in trouble or not |  |  | 1-5 | 3.58 | 1.19 | 1=Strongly disagree…5=Strongly agree | |
|  | I like to have fun when I can, even if I’ll get in trouble for doing them later on |  |  | 1-5 | 3.88 | 1.04 | 1=Strongly disagree…5=Strongly agree | |
| ***Neutralization of Guilt*** | | 6 | 0.83 |  |  |  |  | |
|  | It is okay to lie if it keeps my friends from getting in trouble with their parents or with the police |  |  | 1-5 | 3.31 | 1.16 | 1=Strongly disagree…5=Strongly agree | |
|  | It is okay to lie to someone to keep myself from getting in trouble with them |  |  | 1-5 | 3.24 | 1.18 | 1=Strongly disagree…5=Strongly agree | |
|  | It is okay to steal something if someone is rich and can easily replace it |  |  | 1-5 | 2.35 | 1.03 | 1=Strongly disagree…5=Strongly agree | |
|  | It is okay to steal small items from a store without paying because stores have a lot of money and this does not affect them |  |  | 1-5 | 2.29 | 1.06 | 1=Strongly disagree…5=Strongly agree | |
|  | It is okay to hit others if others hit me first |  |  | 1-5 | 3.92 | 1.09 | 1=Strongly disagree…5=Strongly agree | |
|  | It is okay to hit people if it’s for my own defense |  |  | 1-5 | 4.12 | 0.95 | 1=Strongly disagree…5=Strongly agree | |
| ***Negative Peer Influence*** | | 3 | 0.50 |  |  |  |  | |
|  | If your friends were getting in trouble in your home, would you continue being their friend? |  |  | 1-5 | 2.60 | 0.89 | 1=No, definitely not…5=Yes, definitely | |
|  | If your friends were getting in trouble at school, would you continue being their friend? |  |  | 1-5 | 2.58 | 0.89 | 1=No, definitely not…5=Yes, definitely | |
|  | If your friends were getting in trouble with the police, would you continue being their friend? |  |  | 1-5 | 2.16 | 0.74 | 1=No, definitely not…5=Yes, definitely | |
| ***Peer Delinquency a*** | | 5 | 0.83 |  |  |  |  | |
| During the last six months, how many friends have… | |  |  |  |  |  |  | |
|  | stolen something? |  |  | 1-5 | 1.95 | 1.12 | 1=None…5=All of them | |
|  | attacked someone? |  |  | 1-5 | 2.01 | 1.22 | 1=None…5=All of them | |
|  | sold marijuana or other illegal drugs? |  |  | 1-5 | 1.24 | 0.70 | 1=None…5=All of them | |
|  | used illegal drugs? |  |  | 1-5 | 1.56 | 1.05 | 1=None…5=All of them | |
|  | belong to or have joined a gang or “mara”? |  |  | 1-5 | 1.27 | 0.79 | 1=None…5=All of them | |
| **Peer/Individual Protective Factors** | |  |  |  |  |  |  | |
| ***Belief in the Moral Order*** | | 4 | 0.79 |  |  |  |  | |
|  | It is important to be honest with your parents, even if they become upset or you get punished. |  |  | 1-4 | 3.45 | 0.92 | 1=No!...4=Yes! | |
|  | I think sometimes it’s okay to cheat at school. |  |  | 1-4 | 2.92 | 1.32 | 1=Yes!...4=No! | |
|  | I think it is okay to take something without asking if you can get away with it. |  |  | 1-4 | 3.28 | 1.15 | 1=Yes!...4=No! | |
|  | It is all right to beat up people if they start the fight. |  |  | 1-4 | 1.99 | 1.29 | 1=Yes!...4=No! | |
| ***Rewards for Prosocial Involvement*** | | 4 | 0.79 |  |  |  |  | |
| What are the chances you would be seen as cool if you.. | |  |  |  |  |  |  | |
|  | … worked hard at school? |  |  | 1-5 | 3.15 | 1.34 | 1=No or very little chance…5=Very good chance | |
|  | …defended someone who was being verbally abused at school? |  |  | 1-5 | 2.96 | 1.46 | 1=No or very little chance…5=Very good chance | |
|  | …regularly volunteered to do community service? |  |  | 1-5 | 3.03 | 1.44 | 1=No or very little chance…5=Very good chance | |
|  | …made a commitment to stay drug-free? |  |  | 1-5 | 3.34 | 1.61 | 1=No or very little chance…5=Very good chance | |
| ***Interaction with Prosocial Peers*** | | 5 | 0.83 |  |  |  |  | |
| In the past 6 months, how many of your best friends have… | |  |  |  |  |  |  | |
|  | …participated in clubs, organizations or activities at school? |  |  | 0-4 | 2.33 | 1.64 | 0=None of my friends…4=4 of my friends | |
|  | …made a commitment to stay drug-free? |  |  | 0-4 | 1.67 | 1.76 | 0=None of my friends…4=4 of my friends | |
|  | …liked school? |  |  | 0-4 | 2.36 | 1.63 | 0=None of my friends…4=4 of my friends | |
|  | …regularly attended religious services? |  |  | 0-4 | 1.92 | 1.57 | 0=None of my friends…4=4 of my friends | |
|  | …tried to do well in school? |  |  | 0-4 | 2.31 | 1.59 | 0=None of my friends…4=4 of my friends | |
| ***Social Skills*** | | 3 | 0.75 |  |  |  |  | |
|  | It’s 8:00 on a weeknight and you are about to go over to a friend’s home when your mother asks you where you are going. You say, “Oh, just going to go hang out with some friends.” She says, “No, you’ll just get into trouble if you go out. Stay home tonight.” What would you do now? |  |  | 1-4 | 3.12 | 0.90 | 1=Leave the house anyway…4=Explain what you are going to do with your friend, tell your mom or dad when you’d get home, and ask if you can go out | |
|  | You are visiting another part of town, and you don’t know any of the people your age there. You are walking down the street, and some teenager you don’t know is walking toward you. He is about your size, and as he is about to pass you, he deliberately bumps you and you almost lose your balance. What would you say or do? |  |  | 1-4 | 3.06 | 1.01 | 1=Push the person back…4=Say “Excuse me” and keep on walking | |
|  | You are at a party at someone’s house, and one of your friends offers you a drink containing alcohol. What do you say or do? |  |  | 1-4 | 2.81 | 0.90 | 1=Drink it…4=Tell your friend “No thanks, I don’t drink” and suggest that you and your friend go and do something else. | |
| *a. Responses for those reported that they do not have a group of friends were coded "none" for all the items in peer delinquency factor.* | | | | | | | | |
| *b. "I don't know" coded as "No" for further analyses.* | |  |  |  |  |  |  | |
